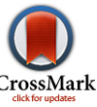

# Areca Nut Components Affect COX-2, Cyclin B1/cdc25C and Keratin Expression, PGE<sub>2</sub> Production in Keratinocyte Is Related to Reactive Oxygen Species, CYP1A1, Src, EGFR and Ras Signaling

Mei-Chi Chang<sup>1,9</sup>, Yi-Jane Chen<sup>2,9</sup>, Hsiao-Hua Chang<sup>2</sup>, Chiu-Po Chan<sup>3</sup>, Chien-Yang Yeh<sup>2</sup>, Yin-Lin Wang<sup>2</sup>, Ru-Hsiu Cheng<sup>1</sup>, Liang-Jiunn Hahn<sup>2</sup>, Jiiang-Huei Jeng<sup>2\*</sup>

**1** Team of Biomedical Science, Chang-Gung University of Science and Technology, Kwei-Shan, Taoyuan, Taiwan, **2** Laboratory of Pharmacology, Toxicology and Chemical Carcinogenesis, School of Dentistry and Department of Dentistry, National Taiwan University Hospital; and National Taiwan University Medical College, Taipei, Taiwan, **3** Department of Dentistry, Chang Gung Memorial Hospital, Taipei, Taiwan

## Abstract

**Aims:** Chewing of betel quid (BQ) increases the risk of oral cancer and oral submucous fibrosis (OSF), possibly by BQ-induced toxicity and induction of inflammatory response in oral mucosa.

**Methods:** Primary gingival keratinocytes (GK cells) were exposed to areca nut (AN) components with/without inhibitors. Cytotoxicity was measured by 3-(4,5-dimethyl- thiazol- 2-yl)-2,5-diphenyl-tetrazolium bromide (MTT) assay. mRNA and protein expression was evaluated by reverse transcriptase-polymerase chain reaction (RT-PCR) and western blotting. PGE<sub>2</sub>/PGF<sub>2α</sub> production was measured by enzyme-linked immunosorbent assays.

**Results:** Areca nut extract (ANE) stimulated PGE<sub>2</sub>/PGF<sub>2α</sub> production, and upregulated the expression of cyclooxygenase-2 (COX-2), cytochrome P450 1A1 (CYP1A1) and hemeoxygenase-1 (HO-1), but inhibited expression of keratin 5/14, cyclinB1 and cdc25C in GK cells. ANE also activated epidermal growth factor receptor (EGFR), Src and Ras signaling pathways. ANE-induced COX-2, keratin 5, keratin 14 and cdc25C expression as well as PGE<sub>2</sub> production were differentially regulated by α-naphthoflavone (a CYP 1A1/1A2 inhibitor), PD153035 (EGFR inhibitor), pp2 (Src inhibitor), and manumycin A (a Ras inhibitor). ANE-induced PGE<sub>2</sub> production was suppressed by *piper betle* leaf (PBL) extract and hydroxychavicol (two major BQ components), dicoumarol (a NAD(P)H:Quinone Oxidoreductase - NQO1 inhibitor) and curcumin. ANE-induced cytotoxicity was inhibited by catalase and enhanced by dicoumarol, suggesting that AN components may contribute to the pathogenesis of OSF and oral cancer via induction of aberrant differentiation, cytotoxicity, COX-2 expression, and PGE<sub>2</sub>/PGF<sub>2α</sub> production.

**Conclusions:** CYP4501A1, reactive oxygen species (ROS), EGFR, Src and Ras signaling pathways could all play a role in ANE-induced pathogenesis of oral cancer. Addition of PBL into BQ and curcumin consumption could inhibit the ANE-induced inflammatory response.

**Citation:** Chang M-C, Chen Y-J, Chang H-H, Chan C-P, Yeh C-Y, et al. (2014) Areca Nut Components Affect COX-2, Cyclin B1/cdc25C and Keratin Expression, PGE<sub>2</sub> Production in Keratinocyte Is Related to Reactive Oxygen Species, CYP1A1, Src, EGFR and Ras Signaling. PLoS ONE 9(7): e101959. doi:10.1371/journal.pone.0101959

**Editor:** Yuan-Soon Ho, Taipei Medical University, Taiwan

**Received:** May 7, 2014; **Accepted:** June 12, 2014; **Published:** July 22, 2014

**Copyright:** © 2014 Chang et al. This is an open-access article distributed under the terms of the Creative Commons Attribution License, which permits unrestricted use, distribution, and reproduction in any medium, provided the original author and source are credited.

**Data Availability:** The authors confirm that all data underlying the findings are fully available without restriction. All relevant data are within the paper and its Supporting Information files.

**Funding:** This study is supported by grants from National Science Council, Taiwan, R.O.C. (NSC102-2314-B-255-003-MY2, NSC102-2628-B-255-001-MY3, NSC101-2320-B-255-002, NSC-100-2314-B-002-094 and NSC-101-2320-B-255-002) and Chang Gung Memorial Hospital (NMRPF3C0061, NMRPF3C0091, NMRPF3B0071). The funders had no role in study design, data collection and analysis, decision to publish, or preparation of the manuscript.

**Competing Interests:** The authors have declared that no competing interests exist.

\* Email: jhjeng@ntu.edu.tw

<sup>9</sup> These authors contributed equally to this work.

## Introduction

Oral leukoplakia, oral submucous fibrosis (OSF) and oral cancer are popular diseases in India, Taiwan, Sri Lanka and many other south-east Asian countries where betel quid (BQ) chewing is popular [1–3]. Oral cancer has been the 4th cancer death reason in the male of Taiwan. BQ is considered to be one major

contributing factor. BQ contains mainly areca nut (AN), inflorescence *piper betle*, lime with/without *piper betle* leaf (PBL) or tobacco [2]. However, the precise mechanisms are still not clear. Chemical carcinogenesis is a multi-step processes including initiation, promotion and progression, where genetic (DNA damage) and epigenetic alterations (histone acetylation, tissue inflammation etc.) are involved [2,4]. Some chemical carcinogens

should be metabolically activated to direct-acting electrophiles or generation of reactive oxygen species (ROS) by cytochrome P450 (CYP) or other phase 1 enzymes prior to reacting with DNA [4]. ROS production and tissue inflammation may further contribute to the carcinogenic processes by inducing more DNA damage, cell cycle arrest, aberrant differentiation, changes of signal transduction pathways, and thereby OSF and clinical tumors as observed in BQ chewers [5]. Moreover, epidermal growth factor receptor (EGFR), Src and Ras activation are possible molecular factors for chemical carcinogenesis [6–8]. However, their roles in the pathogenesis of BQ chewing-related oral mucosal diseases are still obscure.

EGFR (HER1, erbB1) is a receptor tyrosine kinase (RTK) that regulates the cell proliferation and differentiation via Src, Ras or phosphoinositide 3-kinase (PI3K)/protein kinase B (AKT) signaling. Recently, EGFR expression, activation and downstream k-Ras as well as mitogen-activated protein kinase (MAPK) signaling are shown to be involved in the pathogenesis oral cancer [6,8]. Src is a non-receptor tyrosine kinase that can be activated by metals, ROS and UV irradiation [7]. Activated Src and Ras may induce downstream signaling of MAPK, nuclear factor kappa B (NF- $\kappa$ B) and PI3K [8]. Accumulating evidence indicates that ROS generated during metabolism of toxic chemicals may activate receptors, receptor-activated protein kinases and nuclear transcription factors, including growth factor receptors, Src kinase, Ras signaling, MAPKs, PI3K/Akt pathway, NF- $\kappa$ B, activator protein 1, p53 etc [7,8]. Signaling of these pathways by ROS may mediate global cellular effects including DNA/cell damage, inflammation, cell cycle regulation, apoptosis and gene expression [7]. Excessive ROS production may also cause lipid peroxidation, protein modification and DNA damage. Interestingly, exposure to BQ has been shown to induce ROS production *in vitro* and *in vivo* and MAPK activation [2,9], implicating its role in the activation of upstream EGFR, Src and Ras signaling in oral mucosal cells.

Cyclooxygenase-2 (COX-2) expression and prostanoids production may regulate inflammatory responses such as vasodilatation, increase of vascular permeability, stimulation of inflammatory cell infiltration that are popularly noted in oral mucosa of oral cancer and OSF [2]. An elevated expression of COX-2 in oral cancer with different stages has been reported [10]. Tissue inflammation has been shown to play critical role in multistage chemical carcinogenesis via generation of DNA-damaging ROS by inflammatory cells, suppression of immune defense, stimulation of lipid peroxidation, angiogenesis, cell proliferation, tumor invasion and metastasis [11]. Previous reports have found the induction of COX-2 and PGE<sub>2</sub> production of gingival keratinocytes (GK) by AN extract (ANE) via activation of MEK/ERK [12]. Whether EGFR, Src and Ras are important in this event awaits further investigation, because the mutation and elevated expression of CYP, COX2, EGFR, Src and Ras in oral cancer and precancer are reported [6,8,13,14]. Moreover, PBL and its phenolic – hydroxychavicol (HC) exhibit antioxidative property, but is also reported to possess potential oxidative stress [15,16]. Clinically one critical health issue is whether addition of PBL into BQ and consumption of ginger/curry may enhance or attenuate the carcinogenicity of BQ.

To further understand the chemical carcinogenesis of BQ chewing-related cancer, we proposed that BQ can be metabolized by CYP to generate ROS and activate EGFR, Src, and Ras signaling pathways to stimulate COX-2 expression, prostanoids production and affect the differentiation of GK. The results of this study may highlight our knowledge on the pathogenesis of BQ-related cancer and is useful for future chemoprevention and targeting therapy of BQ chewing-related diseases.

## Materials and Methods

### Materials

Keratinocyte growth medium (KGM-SFM), pituitary gland extract and epidermal growth factor (EGF) etc. were from Gibco (Life Technologies, BRL, Grand Island, NY, USA). Catechol, arecoline, PD153035, manumycin A, pp2, curcumin, catalase,  $\alpha$ -naphthoflavone, Zn-protoporphyrin dicoumarol and 3-(4,5-dimethyl-thiazol-2-yl)-2,5-diphenyl-tetrazolium bromide (MTT) were obtained from Sigma (Sigma Chemical Company, St. Louis, MO, USA). PGE<sub>2</sub> and PGF<sub>2 $\alpha$</sub>  ELISA kits were purchased from Cayman Chemical Company (Ann Arbor, MI, USA). Reagents for reverse transcription (RT) and polymerase chain reaction (PCR) were purchased from Invitrogen (Invitrogen Corporation, Carlsbad, CA, USA). Total RNA isolation kits were from Macherey-Nagel (Macherey-Nagel Inc., Easton, PA, USA). ANE and PBL extract were prepared and weighed as previously [12,15]. Hydroxychavicol (HC) was synthesized and characterized as before [16]. Specific PCR primer sets for COX-2, CYP450 isoforms, hemeoxygenase-1 (HO-1), cyclinB1, cdc25C, cdc2, keratin 5, keratin 14 and  $\beta$ -actin were synthesized by Genemed Biotechnologies, Inc. (San Francisco, CA, USA). Pathscan p-Src (Y416) and p-EGFR (Tyr845) ELISA kits were from Cell Signaling (Cell Signaling Technology Inc., MA, USA). EZ-Detect<sup>TM</sup> Ras activation assay kits were from Pierce (Rockford, IL, USA). Mouse anti-human COX-2 and anti-GAPDH antibody were from Santa Cruz.

### Culture of Gingival Keratinocytes (GK)

GK were cultured as described previously [12]. Clinically human gingiva (with a gingivitis index <1) was acquired during crown-lengthening procedures with written informed consent by the patients and approval by the Ethics Committee, National Taiwan University Hospital. The individual in this manuscript has given written informed consent to publish these case details. Most of the subepithelial connective tissue was removed first by a surgical knife and then gingival tissues were cut into small pieces, placed onto culture dishes in KGM-SFM with supplements. The cell passages ranging from 1 to 3 were used for this study.

### Effect of ANE on Prostanoids Production of GK

Near confluent GK in 6-well culture plates were exposed to 2 ml fresh medium containing various concentrations of ANE, catechol or PBL extract. Cells were further incubated for 24 h. Culture medium was collected for analysis of PGE<sub>2</sub> and PGF<sub>2 $\alpha$</sub>  by ELISA.

### Effect of ANE on EGFR and Src Activation in GK

Near confluent GK were exposed to ANE (800  $\mu$ g/ml) for different time periods (0–120 min). Cells were washed with phosphate-buffered saline (PBS) and then cell lysates were prepared by dissolving cells in lysis buffer (20 mM Tris (pH 7.5), 150 mM NaCl, 1 mM ethylene diaminetetraacetate (EDTA), 1 mM ethylene glycolbis (2-aminoethyl)-N,N,N',N'-tetraacetic acid (EGTA), 1% Triton X-100, 2.5 mM sodium pyrophosphate, 1 mM  $\beta$ -glycerolphosphate, 1 mM Na<sub>3</sub>VO<sub>4</sub>, 1  $\mu$ g/ml leupeptin. Protein concentrations were determined by BioRad protein assay kit. Equal amounts of protein (600  $\mu$ g) were used for analysis of Src and EGFR activation by Pathscan p-Src (Y416) and p-EGFR (Tyr845) ELISA according to the manufacture's instruction [17].

### Effects of ANE on Ras Activation of GK

Activation of Ras in GK by AN extract was measured using the EZ-Detect<sup>TM</sup> Ras activation assay kits as described previously

[18]. Near confluent GK were exposed to AN extract (800 µg/ml) for 0, 30, 60 and 120 sec. Cell lysates were collected and 500 µg of proteins were incubated with 80 µg GST-Raf1-RBD and SwellGel Immobilized Glutathione Disc in a rotor at 4°C for 1 h. Cell lysates that were preincubated with 10 mM GTPγS and used as positive control. The active Ras-GTP was pulled down from the cell lysates by centrifugation at 10000 rpm for 1 min and then subjected to electrophoresis and transferred to polyvinylidene difluoride (PVDF) membrane. The membrane was soaked in blocking reagent (20 mM Tris, pH 7.4; 125 mM NaCl; 0.2% Tween 20; 5% nonfat dry milk; and 0.1% sodium azide) at room temperature for 30 min and incubated for 2 h with anti-Ras antibody. Membranes were exposed to secondary antibody, washed and the immuno-reactive bands were detected on Fuji X-ray film by Enhanced Chemiluminescence (ECL) reagents.

### Effect of Various Inhibitors on the ANE-induced PGE<sub>2</sub> Production of GK and the Concomitant Cytotoxicity

Near confluent GK were exposed to fresh medium containing ANE (800 µg/ml) with/without inhibitors (catalase, α-naphthoflavone, Zn-protoporphyrin, PD153035, pp2, manumycin, PBL extract, HC, curcumin or dicoumarol) for 24 hr. Inhibitors were added 30 min before ANE and then co-incubated for 24 hr. Culture medium was collected for measurement of PGE<sub>2</sub> production by enzyme-linked immunosorbant assay (ELISA). Results were expressed as concentration of PGE<sub>2</sub> and PGF<sub>2α</sub> (pg/ml). In some experiments, cell layers were washed by PBS and cytotoxicity was measured by MTT assay as before [12]. Briefly, cell layers were incubated with fresh medium containing 0.5 mg/ml of MTT for 2 h. The produced formazan was dissolved in 2 ml of dimethylsulfoxide (DMSO) and read at OD540 with a Dynatech Microwell plate reader.

### Effect of ANE on COX-2, CYP1A1, Keratins and Cell Cycle-related Genes Expression in GK and its Modulation by Catalase, α-naphthoflavone, Zn-protoporphyrin, PD153035, pp2, Manumycin A, Aspirin, PBL Extract or HC

Near confluent GK were incubated in KGM-SFM containing ANE (100–800 µg/ml) for 24-hrs. Cell layers were washed with PBS, dissolved and used for RNA isolation by RNA isolation kits. In some experiments, GK were exposed to ANE with/without inhibitors (as indicated) for 24 h. Inhibitors were added 30 min before addition of ANE and then co-incubated.

*Semi-quantitative Reverse-transcriptase and Polymerase Chain Reaction (RT-PCR)* [12] - Briefly, 3 µg of denatured total RNA was reverse transcribed in a total volume of 80 µl reaction mixture containing 8 µl of random hexamer, 8 µl of dNTP (10 mM), RNA and DEPC water at 65°C for 5 min and more than 2 min at 4°C. Then 80 µl of cDNA synthesis mixture (by mixing 104 µl of 10× RT buffer, 104 µl 0.1 M Dithiothreitol [DTT], 208 µl 25 mM MgCl<sub>2</sub>, 28 µl of RNase OUT™, 28 µl SuperScript™ III RT and 8 µl DEPC water) were added into above tubes. The reaction mixtures were allowed for incubation at 25°C for 10 min, 50°C for 50 min and 85°C for 5 min. Finally, 1 µl of RNase H was added and incubated at 37°C for 20 min.

Five microliters of cDNA were used for PCR amplification in 50 µl reaction mixture containing 5 µl of 10× TAQ buffer, 4 µl of dNTP (2.5 mM), 1 µl of each specific primer, and 0.2 µl of Super TAQ enzyme (2 U/ µl). They were heated to 94°C for 5 minutes in the first cycle, then amplified for 15–35 cycles of 94°C for 1 min, 55°C for 1 min and then 72°C for 2 min with a thermal

cycler (Perkin Elmer 4800, PE Applied Biosystems, Foster city, CA, USA). Finally, the reaction was terminated at 72°C for 10 minutes. The sequence of primer pairs was shown in **Table 1** [19–22]. The amplified DNA products were loaded into a 1.8% of agarose gel in 1× of Tris/Borate/EDTA (TBE) buffer for electrophoresis. Gels were stained with ethidium bromide, photographed under UV camera and AlphaEaseFC software program.

### Effect of ANE on COX-2 Protein Expression and Src (Y416) Phosphorylation in GK – Western Blotting Analysis

Near confluent GK were exposed to ANE for different time points. Cell lysates was prepared as described before using lysis buffer (10 mM Tris-HCl, pH 7; 140 mM sodium chloride; 3 mM MgCl<sub>2</sub>; 0.5% NP-40; 2 mM phenylmethylsulfonyl fluoride; 1% aprotinin; and 5 mM DTT) [12]. The concentration of protein was determined by Bio-Rad protein assay kits. Proteins (50 µg/lane) were loaded for 12% SDS-polyacrylamide gel electrophoresis (Scie-Plas, UK) and then transferred to PVDF membrane for electroblotting. The membranes were blocked for 30 min at room temperature in a blocking reagent (20 mM Tris, pH 7.4; 125 mM NaCl; 0.2% Tween 20; 5% nonfat dry milk; and 0.1% sodium azide) and incubated for 2 h with mouse anti-human phospho-Src (Y416), anti-COX-2 and anti-glyceraldehyde-3-phosphate dehydrogenase (GAPDH) antibodies. Membranes were rinsed three times with TBST (10 mM Tris, pH 7.5; 100 mM NaCl, 0.1% Tween-20) for 10 min each, and then incubated with goat anti-mouse secondary antibody for 1 h. The membranes were washed 4 times with TBST and the immuno-reactive bands were developed by ECL reagent and visualized on Fuji X-ray film.

### Statistical Analysis

Four or more separate experiments were performed. Results were expressed as Mean ± SE and analyzed by one-way ANOVA and post hoc Tukey test. A p value <0.05 was considered to have statistically significant difference between 2 study groups.

## Results

**Effect of BQ Components on the Cytotoxicity and Prostanoids Production of GK** Retraction and vacuoles formation of GK were noted after exposure to ANE for 24-h. ANE stimulates COX-2 expression and PGE<sub>2</sub> production [12]. We further found that ANE induced PGF<sub>2α</sub> production in GK (**Figure 1A**), but arecoline lacked of this effect (**Figure 1B**). Since ROS are shown to mediate the ANE genotoxicity and cytotoxicity to different cells [2], we tested and found that catalase (500 and 1000 U/ml) pretreatment and co-incubation attenuated the ANE-induced PGE<sub>2</sub> production in GK (**Figure 1C**). Accordingly, catalase inhibited the ANE-induced COX-2 protein expression in GK (**Figure 1D**). Catalase was able to prevent the ANE-induced cytotoxicity (**Figure 1E**). The other BQ components, catechol (0.1–0.8 mM) and PBL extract (100–1500 µg/ml), showed little stimulatory effect on PGE<sub>2</sub> production in GK and even inhibited basal level of PGE<sub>2</sub> production (**Figure 1F, 1G**).

### Cytotoxicity of ANE, Arecoline and Catechol on GK

ANE showed mild cytotoxicity to GK (63% of control) at a concentration of 800 µg/ml (**Figure 1H**). Arecoline slightly decreased the viable cell number at a concentration of 0.8 mM (P>0.05) (**Figure 1I**). However, catechol showed little cytotoxicity to GK at concentrations of 0.1–0.3 mM (**Figure 1J**).

**Table 1.** PCR primers used in this study and the size of generated products.

| Name of primers | Primer sequence             | Primer sequence          | expected product | Reference                  |
|-----------------|-----------------------------|--------------------------|------------------|----------------------------|
| $\beta$ -actin  | AAGAGAGGCATCCTCACCCCT       | TACATGGCTGGGGTGTGGAA     | 218 bp           | Chang et al. (2010) [20]   |
| COX-2           | TTCAAATGAGATTGTGGGAAAATTGCT | AGATCATCTCTGCTGAGTATCTT  | 305 bp           | Chang et al. (2010)        |
| CYP1A1          | TCACAGACAGCCTGATTGAG        | GATGGGTTGACCCATAGCTT     | 432 bp           | Hakkola et al. (1996) [19] |
| CYP1A2          | TGGCTTCTACATCCCAAGAAAT      | TTCATGGTCAGCCCGTAGAT     | 308 bp           | Hakkola et al. (1996)      |
| CYP2B6/B7       | CCATACACAGAGGCAGTCAT        | GGTGTGAGATCGATGTCTTC     | 356 bp           | Hakkola et al. (1996)      |
| CYP2A6/A7       | GTGTGGACATGATGCCGT          | AGGACTTGAGGCGGAAGT       | 1151 bp          | Hakkola et al. (1996)      |
| CYP2C8/19       | GCTAAAGTCCAGAAAGAGATTGA     | TCCTGCTGAGAAAAGGCATGAAAT | 332 bp           | Hakkola et al. (1996)      |
| CYP2E1          | AGCACAACTCTGAGATATGG        | ATAGTCACTGTACTTGAAGT     | 365 bp           | Hakkola et al. (1996)      |
| CYP2F1          | ATGAACTTGCCGACCCGCGT        | AGCGAAAAGCTCTGCAGGAT     | 283 bp           | Hakkola et al. (1996)      |
| CYP3A3/A4       | CCAAGCTATGCTTCCACCG         | TCAGGCTCCACTTACGGTGC     | 323 bp           | Hakkola et al. (1996)      |
| CYP3A5          | TGTCACAGAAACTGCAAA          | TTGAAGAAGTCTTGCCTGTTC    | 470 bp           | Hakkola et al. (1996)      |
| CYP3A7          | CTATGATACTGTGCTACAGT        | TCAGGCTCCACTTACGGTCT     | 474 bp           | Hakkola et al. (1996)      |
| HO-1            | AAGATTGCCAGAAAAGCCTGGAC     | AAGATTGCCAGAAAAGCCTGGAC  | 399 bp           | Chang et al. (2010) [20]   |
| Cdc2            | GGGGATTGAGAAATTGATCA        | GGGGATTGAGAAATTGATCA     | 288 bp           | Chang et al. (2010)        |
| Cdc25C          | CCTGGTGAAGCTTCAAGACC        | GCAGATGAAGTACACATTGCATC  | 456 bp           | Chang et al. (2010)        |
| Cyclin B1       | AAGAGCTTTAAACTTTGGTCTGGG    | CTTTGTAAGTCTTGATTACCATG  | 317 bp           | Chang et al. (2010)        |
| Keratin 5       | TGGTCTCCCGTGCCGAGTTCTAT     | ATTTGGGATTGGGGTGGGATTCT  | 139 bp           | Endres et al. (2005) [21]  |
| Keratin 14      | TTCTCACAGCCACAGTGGAC        | CATTGACATCTCCACCCACC     | 281 bp           | Brown et al. (1994) [22]   |

doi:10.1371/journal.pone.0101959.t001

### Role of CYP1A1/1A2 and HO-1 in ANE-induced PGE<sub>2</sub> Production and COX-2 Expression in GK

ROS is generated by auto-oxidation of ANE or during metabolic activation of pro-carcinogens by CYPs [9]. We detected that GK expressed CYP1A1, 2C8/19, 2E1, 3A3/3A4 as analyzed by RT-PCR. But no PCR product was generated by using primers of CYP1A2, 2B6/B7, 2A6/A7, 2F1, 3A5 and 3A7 (**Figure 2A**). Exposure of GK to ANE (800  $\mu$ g/ml) stimulated CYP1A1 mRNA expression after 24-hr of exposure (**Figure 2B**). Interestingly,  $\alpha$ -naphthoflavone (10 and 25  $\mu$ M), a CYP1A1/1A2 inhibitor, attenuated the ANE-induced PGE<sub>2</sub> production in GK (**Figure 2C**). However,  $\alpha$ -naphthoflavone showed little preventive effect on ANE cytotoxicity as analyzed by MTT assay (**Figure 2D**). HO-1 as an oxidative stress response gene has been shown to have tissue protective effect, to resolve inflammation and may control tissue homeostasis [23]. We found that ANE stimulated HO-1 expression in GK (**Figure 2E**) and this event was attenuated by catalase (**Figure 2F**). Interestingly, inhibition of HO-1 by Zn-protoporphyrin (2.5 and 5  $\mu$ M) decreased the ANE-induced PGE<sub>2</sub> production (**Figure 2G**). This is partly due to cytotoxicity, because Zn-protoporphyrin partially enhanced the ANE-induced cytotoxicity (**data not shown**).

### Effect of EGFR Activation on ANE-induced COX-2 Expression and PGE<sub>2</sub> Production in GK

ANE (800  $\mu$ g/ml) stimulated EGFR (Tyr845) phosphorylation as noted after 2.5 min of exposure and prolonged for more than 60 min (**Figure 3A**). Pretreatment and co-incubation by non-toxic concentration of PD153035 (1 and 5  $\mu$ M, an EGFR inhibitor) inhibited the ANE-induced PGE<sub>2</sub> production (**Figure 3B**). Accordingly, PD153035 also attenuated the ANE-induced COX-2 expression in GK (**Figure 3C**).

### Activation of Src by ANE and Its Role in Mediating COX-2 Expression and PGE<sub>2</sub> Production in GK

ANE (800  $\mu$ g/ml) stimulated Src activation, beginning after 10 min of exposure and showed significant difference during 30–120 min of exposure (**Figure 4A, 4B**). Intriguingly, inhibition of Src by pp2 (10 and 25  $\mu$ M) effectively suppressed the ANE-induced COX-2 mRNA and protein expression (**Figure 4C**). Accordingly, pp2 also decreased ANE-induced PGE<sub>2</sub> production in GK (**Figure 4D**). No marked enhancement or prevention of ANE cytotoxicity by pp2 was noted in these experimental conditions (**data not shown**).

### Activation of Ras by ANE and Its Role in Mediating COX-2 Expression and PGE<sub>2</sub> Production in GK

ANE (800  $\mu$ g/ml) stimulated Ras activation of GK within short period of exposure (**Figure 4E**). Inhibition of Ras by manumycin A (1 and 5  $\mu$ M) inhibited the ANE-induced COX-2 expression in GK as analyzed by RT-PCR (**Figure 4F**). Pretreatment and co-incubation by manumycin A (1 and 5  $\mu$ M) also decreased the ANE-induced PGE<sub>2</sub> production in GK (**Figure 4G**).

### Effect of Various Inhibitors on the ANE-induced Changes in Cdc2, Cdc25C, CyclinB1, Keratin 5 and Keratin 14 Expression of GK

Exposure to ANE inhibited the cdc2, cdc25C, cyclin B1, keratin 5 and keratin 14 expression of GK (**Figure 5A**). We further evaluated the effect of various inhibitors on the ANE-induced change of keratin 14 (a differentiation marker), cdc25C and cyclin B1 expression. Interestingly  $\alpha$ -naphthoflavone (10 and 25  $\mu$ M) prevented the ANE-induced decrease of keratin 14, cyclin B1 and cdc25C expression (**Figure 5B**). The pp2 alone slightly inhibited cdc25C and cyclin B1 expression. However, pp2 pretreatment and co-incubation attenuated the ANE-induced decline of keratin 14

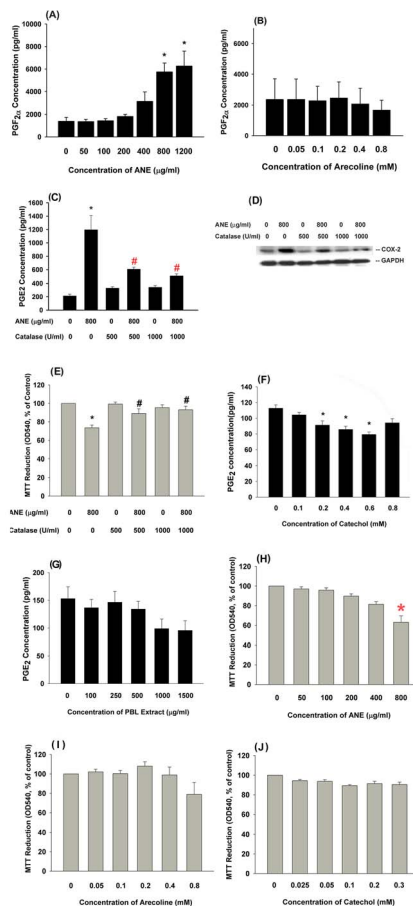

**Figure 1. Effect of AN components on cytotoxicity, COX-2 expression and prostanoids production of GK and its modulation by catalase and PBL extract.** (A) Stimulation of  $\text{PGF}_{2\alpha}$  production of GK by ANE (50–1200  $\mu\text{g/ml}$ ) ( $n=9$ ). (B) Effect of arecoline on  $\text{PGF}_{2\alpha}$  production of GK ( $n=3$ ), (C) The regulation of ANE-induced  $\text{PGE}_2$  production of GK by catalase (500 and 1000 U/ml) ( $n=11$ ), (D) Catalase inhibited the ANE-induced COX-2 protein expression in GK as analyzed by western blotting. One representative western blotting picture was shown. (E) Catalase attenuated the ANE-induced cytotoxicity to GK ( $n=7$ ). (F) Effect of catechol on  $\text{PGE}_2$  production of GK ( $n=4$ ), (G) Effect of PBL extract on  $\text{PGE}_2$  production of GK ( $n=3$ ). Results were expressed as concentration (pg/ml) in the culture medium. (H) Cytotoxicity of ANE to GK ( $n=6$ ), (I) Cytotoxicity of arecoline to GK ( $n=4$ ), (J) Cytotoxicity of catechol to GK ( $n=3$ ). Results were expressed as MTT reduction (% of control, Mean  $\pm$  SE). \*denotes significant difference when compared with control. #denotes statistical significant difference when compared with ANE (800  $\mu\text{g/ml}$ ) solely-treated group ( $P<0.05$ ). doi:10.1371/journal.pone.0101959.g001

expression (Figure 5C). PD153035 showed little preventive effect toward the ANE-induced suppression of keratin 14, cdc25C and cyclin B1 (Figure 5D). On the other hand, manumycin A could not prevent the ANE-induced decline of keratin 14 expression. But manumycin A reversed the ANE-induced decrease in cyclin B1 and cdc25C expression (Figure 5E). Aspirin, a COX inhibitor, was not able to prevent the ANE-induced decline of cyclin B1, cdc25C and keratin 14 expression (Figure 5F).

#### Effect of PBL Extract and HC on ANE-induced COX-2 Expression and $\text{PGE}_2$ Production in GK

One critical health issue is whether addition of PBL into BQ may enhance or attenuate the BQ toxicity. We tested and found

that PBL alone could slightly inhibit the  $\text{PGE}_2$  production of GK (data not shown). In addition, PBL extract (250 and 500  $\mu\text{g/ml}$ ) inhibited the ANE-induced  $\text{PGE}_2$  production in GK (Figure 6A). At non-cytotoxic concentrations, HC (25 and 50  $\mu\text{M}$ ) as a PBL component also suppressed the ANE-induced  $\text{PGE}_2$  production in GK (Figure 6B). Similarly, PBL markedly inhibited the ANE-induced COX-2 mRNA expression (Figure 6C). But the inhibitory effect of HC (25 and 50  $\mu\text{M}$ ) on the COX-2 expression of GK was not so evident (Figure 6D).

#### Effect of Curcumin and Dicoumarol on ANE-induced $\text{PGE}_2$ Production in GK –

To know the preventive strategy for BQ-chewing-related diseases, we tested and found that curcumin (5 and 20  $\mu\text{M}$ ), a plant phenolic in tumeric and curry with antioxidant and anti-inflammatory properties [24] and popularly consumed in Taiwan and India, was shown to inhibit ANE-induced  $\text{PGE}_2$  production in GK (Figure 6E). However, curcumin cannot prevent the ANE-induced cytotoxicity ( $P>0.05$ ) (Figure 6F).

GK was shown to express NADPH:quinone oxidoreductase (NQO-1, also as DT-diaphorase) mRNA and protein (data not shown). Dicoumarol is a natural plant and fungal product with vitamin K antagonist (anticoagulant), NQO-1 inhibitor and NF- $\kappa\text{B}$  inhibitor properties. At non-cytotoxic concentrations (10 and 20  $\mu\text{M}$ ), dicoumarol was shown to inhibit the ANE-induced  $\text{PGE}_2$  production of GK (Figure 6G). Dicoumarol (50 and 100  $\mu\text{M}$ ) by itself showed little cytotoxicity to GK. However, pretreatment and co-incubation with dicoumarol (50 and 100  $\mu\text{M}$ ) increased the ANE-induced cytotoxicity to GK (Figure 6H).

## Discussion

BQ chewing is one major risk factor of oral cancer and OSF. Elevated COX-2 expression and prostanoids production is popularly observed in oral cancer and precancer tissues [10]. AN components are shown to induce tissue injury and inflammation, COX-2 expression and  $\text{PGE}_2$  production in GK [12]. We further found the stimulation of  $\text{PGF}_{2\alpha}$  production of GK by ANE. This may explain why inflammatory cells infiltration is popularly noted in OSF and oral squamous cell carcinoma (OSCC) tissues [2].  $\text{PGE}_2$  and  $\text{PGF}_{2\alpha}$  are important in the multistage carcinogenic processes by sustaining epithelial hyperplasia, angiogenesis, immuno-suppression and tumor metastasis. But  $\text{PGF}_{2\alpha}$  further has its distinct role in skin tumor promotion, angiogenesis, tumor invasion and metastasis [11].  $\text{PGF}_{2\alpha}$  may delay cell mitosis, inhibit cytokinesis, increase aneuploidy and genome instability, and thereby tumor promotion and cell transformation [11]. These results suggest a role of ANE-induced COX-2 expression and prostanoids production in mediating of oral cancer.

ANE can generate ROS during auto-oxidation in the oral cavity or by metabolism of intracellular enzymes [9,25]. In this study, the ANE-induced COX-2 expression,  $\text{PGE}_2$  production and cytotoxicity to GK was prevented by catalase. This indicates ROS production may contribute to the ANE-induced inflammatory reaction of oral mucosa. ROS produced by ANE or generated by infiltrated inflammatory cells may also lead to genome instability of neoplastic cells, alter cellular signaling transduction and gene expression and promote malignant transformation [11], suggesting the use of antioxidants for prevention and treatment of BQ-chewing-related diseases. Little is known about HO-1 in oral carcinogenesis. Interestingly we found that ANE stimulated the expression of HO-1, an oxidative stress response gene with cytoprotective and inflammation resolution effect [23], suggesting

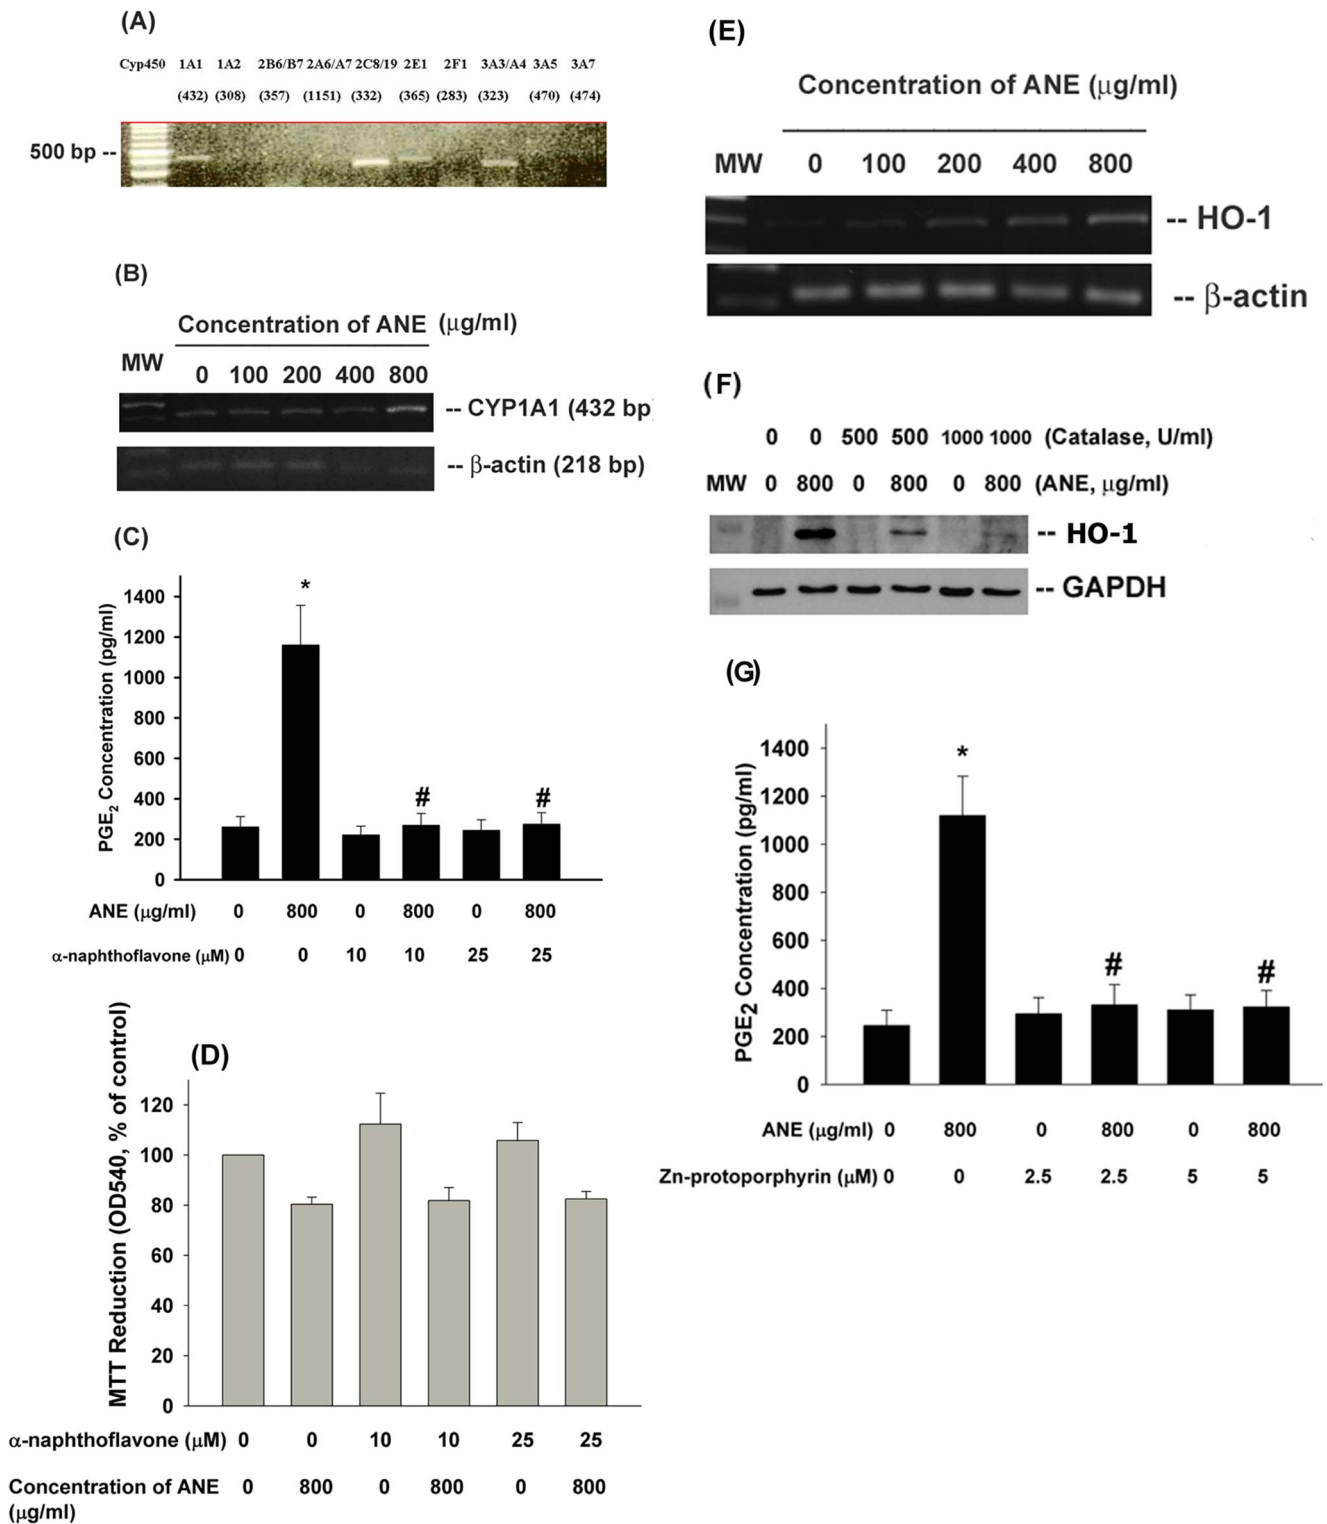

**Figure 2. Role of cytochrome p450 and HO-1 on ANE-induced cytotoxicity and PGE<sub>2</sub> production in GK.** (A) Expression of cytochrome p450 isoforms (1A1, 1A2, 2B6/B7, 2A6/A7, 2C8/19, 2E1, 2F1, 3A3, 3A4, 3A5, 3A7) in cultured GK. One representative RT-PCR picture was shown, (B) Stimulation of CYP1A1 mRNA expression in GK by ANE was noted as revealed by RT-PCR (C)  $\alpha$ -naphthoflavone (10 and 25  $\mu\text{M}$ ) pretreatment and co-incubation prevented the ANE-induced PGE<sub>2</sub> production in GK (n=10). (D) Effect of  $\alpha$ -naphthoflavone on ANE-induced cytotoxicity to GK (n=7), (E) Effect of ANE on HO-1 gene expression of GK, (F) Effect of catalase on ANE-induced HO-1 gene expression of GK, (G) Effect of Zn-protoporphyrin on ANE-induced PGE<sub>2</sub> production in GK. \*denotes significant difference when compared with solvent control. #denotes statistical significant difference when compared with ANE (800  $\mu\text{g/ml}$ ) solely-treated group (P<0.05). doi:10.1371/journal.pone.0101959.g002

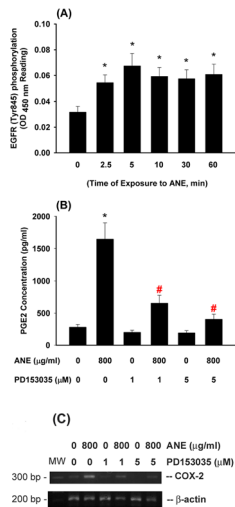

**Figure 3. Effect of ANE on EGFR activation and its role in ANE-induced COX-2 expression and PGE<sub>2</sub> production of GK.** (A) AN extract (ANE) stimulated EGFR (Tyr845) phosphorylation within 60 min of exposure as analyzed by Pathscan p-EGFR ELISA. \*denotes significant difference when compared with solvent control. (n = 10). (B) Pretreatment by PD153035 (1 and 5 μM, an EGFR antagonist) markedly attenuated the ANE-induced PGE<sub>2</sub> production in GK. (C) Effect of PD153035 on ANE-induced COX-2 expression in GK. One representative PCR result was shown. \*denotes significant difference when compared with solvent control. #denotes significant difference when compared with ANE (800 μg/ml)-treated group. doi:10.1371/journal.pone.0101959.g003

the presence of adaptive response to ANE. The stimulation of HO-1 by ANE was mediated by ROS. HO-1 may catalyze the degradation of heme to form ferrous iron, carbon monoxide and biliverdin. Inhibition of HO-1 by Zn-protoporphyrin enhances the ANE cytotoxicity, revealing the protective effect of HO-1 against ANE.

Chemicals can generate ROS by auto-oxidation or via metabolic activation by enzymes such as cytochrome P450 (CYP) [4]. CYP are crucial molecules for tobacco-related oral carcinogenesis [26]. We proposed that CYP may involve in the metabolism of BQ components, transform procarcinogens to DNA-reactive intermediates and contribute to oral cancer. CYP is a group of enzymes (CYP1A1/1A2, CYP1B1, CYP2A6, CYP2D6, CYP2E1/F1 etc.) that can metabolize many distinct dietary or tobacco carcinogens with specificity. In this study, we found that GK express CYP1A1, 2C8/19, 2E1, 3A3/3A4, but little CYP1A2, 2B6/B7, 2A6/A7, 2F1, 3A5 and 3A7, indicating the involvement of CYPs in metabolizing specific endogenous and exogenous chemicals in oral epithelial cells. A decrease in CYP3A, an enzyme for oxidative metabolism of endogenous/exogenous substrates, elevated the risk of susceptibility to OSF [27]. A deficient in CYP2A6 may decrease the risk of oral cancer in BQ chewers in Sri Lanka [28]. We further found that ANE stimulated CYP1A1 expression in GK and α-naphthoflavone prevented the ANE-induced COX-2 expression and PGE<sub>2</sub> production. This reveals that metabolism of ANE by CYPs is crucial for ANE-induced oral mucosal inflammation. However, α-naphthoflavone showed no significant protective effect on ANE-induced cytotoxicity. This indicates that metabolites generated from ANE by CYP1A1/1A2 activation may contribute to stimulation of COX-2 expression and PGE<sub>2</sub> production, but not cytotoxicity. It is probable that additional ANE components are present and cause synergistically the cytotoxicity of ANE on GK. Accordingly, whilst

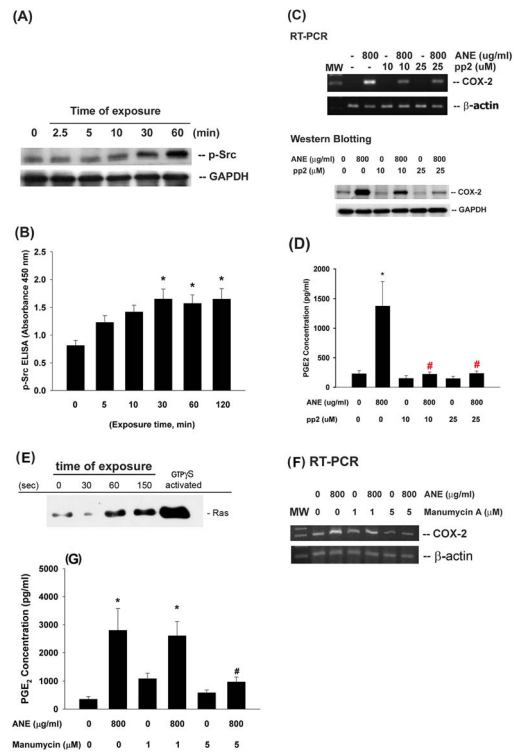

**Figure 4. Effect of ANE on Src and Ras activation and its role in ANE-induced COX-2 expression and PGE<sub>2</sub> production of GK.** (A) GK were exposed to ANE (800 μg/ml) for different time points. Cell lysates were collected and used for analysis of Src phosphorylation (p-Src) by pathscan p-ELISA. Results were expressed as absorbance (OD450) (n = 9). \*denotes significant difference when compared with control. (B) Inhibition of ANE-induced Src phosphorylation in GK by pp2, (C) pp2 inhibited the ANE-induced COX-2 mRNA and protein expression in GK. One representative PCR and western blotting result was shown. (D) pp2 prevented the ANE-induced PGE<sub>2</sub> production in GK (n = 5). (E) ANE induced the activation of Ras in GK. GK were exposed to ANE (800 μg/ml) for different time points (30–150 secs). Cell lysates were collected and used for analysis of Ras activation using Ras activation assay kit (Pierce). GTPγS-activated was the positive control. (F) Manumycin A (1 and 5 μM) effectively prevented the ANE-induced COX-2 expression of GK, (G) Manumycin A also attenuated the ANE-induced PGE<sub>2</sub> production of GK. \*denotes significant difference when compared with solvent control. #denotes statistical significant difference when compared with ANE (800 μg/ml) solely-treated group (P < 0.05) doi:10.1371/journal.pone.0101959.g004

CYP1A1 is the enzyme for metabolism of 2-acetylaminofluorene to generate electrophilic DNA-reactive metabolites, inhibition of CYP1A1 by α-naphthoflavone shows little effect on 2-acetylaminofluorene cytotoxicity toward liver epithelial cells [29]. Previous studies found that administration of ANE to mice stimulates hepatic CYP enzyme activities [30], but arecoline inhibits the 2,3,7,8-Tetrachlorodibenzo-p-dioxin (TCDD)-induced CYP1A1 expression in hepatoma cells [31]. Moreover the induction of CYP1A1 by ANE may potentially promote the metabolic activation of BQ-specific nitrosamines or other tobacco carcinogens and contribute to oral carcinogenesis [32].

BQ components may activate PI3K/Akt, MEK/ERK, JNK, p38 and NF-κB signaling to mediate COX-2 expression, PGE<sub>2</sub> production and cell differentiation [12,33,34]. However, the upstream signaling responsible for initiation of these events is not clarified. EGFR, Src, and Ras are the upstream signaling molecules that are crucial for carcinogenesis [8,35,36]. EGF and

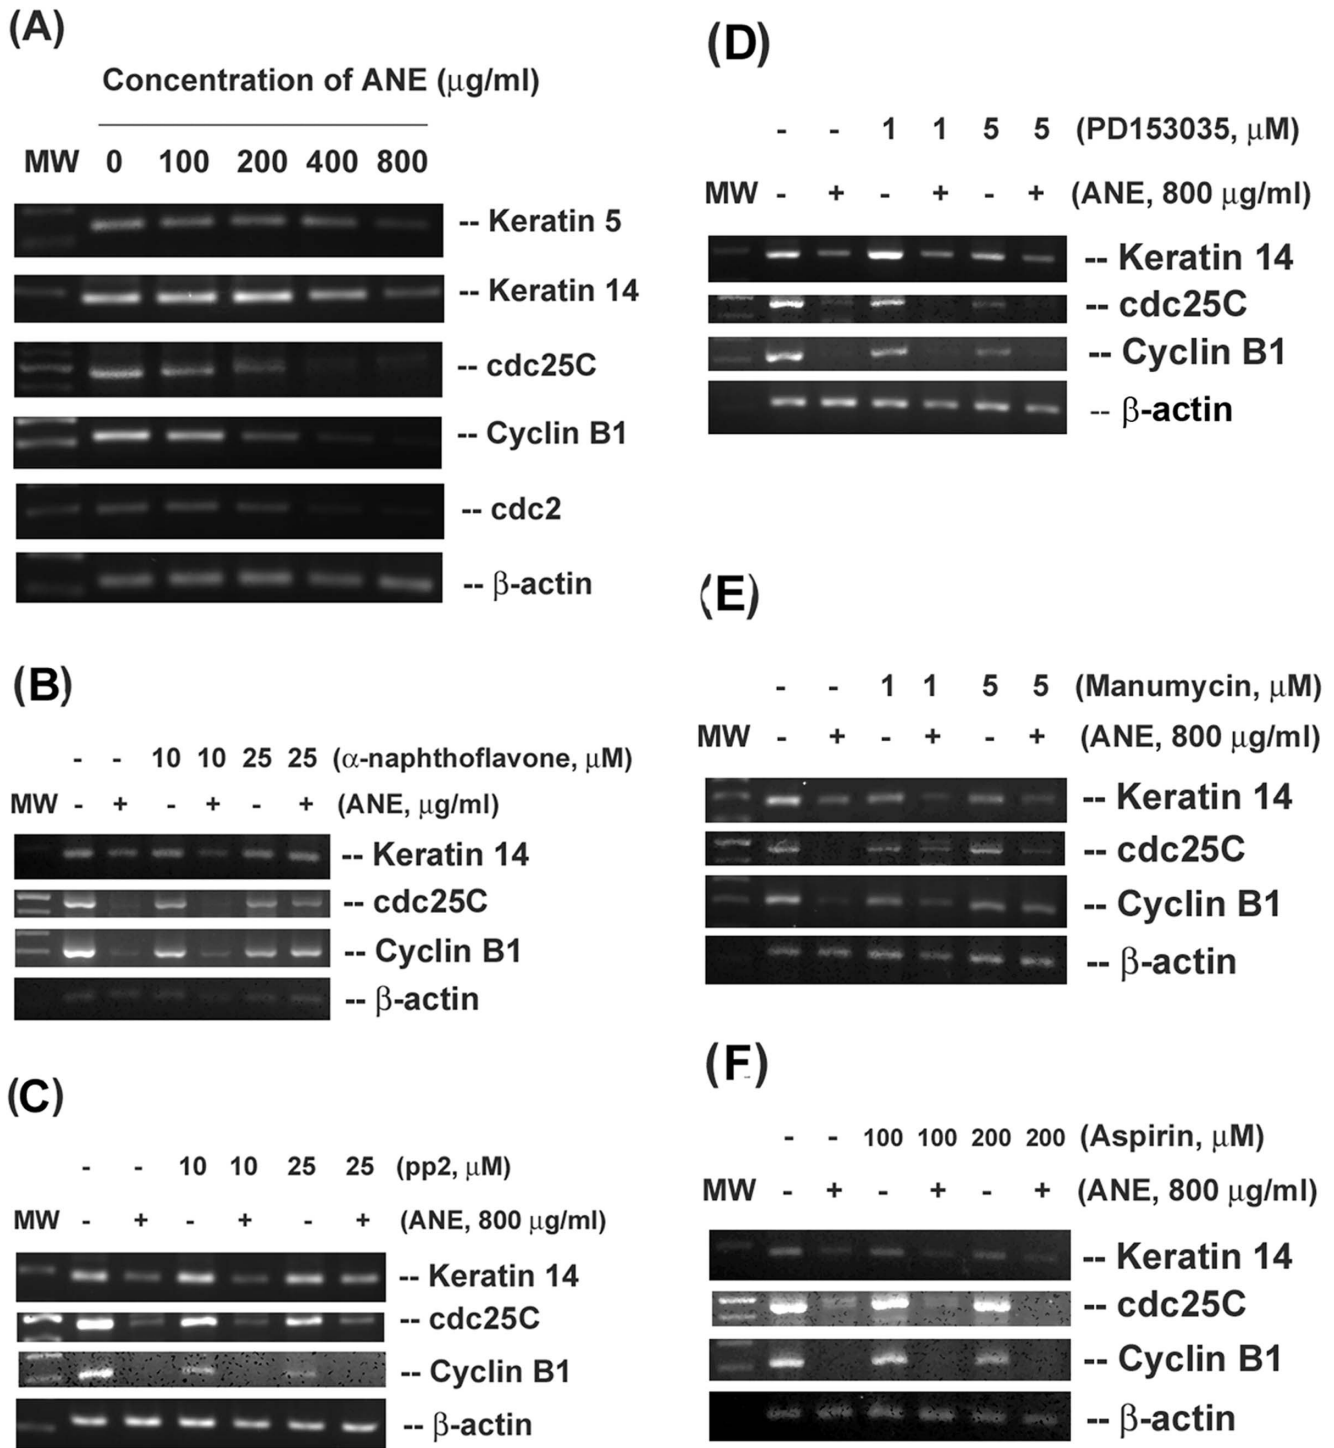

**Figure 5. Effect of ANE on the cell cycle- and differentiation-related genes expression of GK and its modulation by various signal transduction inhibitors.** (A) Effect of different concentrations of ANE on cell cycle- and differentiation-related genes expression. Effect of (B), α-naphthoflavone, (C) pp2, (D) PD153035, (E) manumycin A and (F) aspirin on the ANE-induced changes of keratin 14, cyclin B1 and cdc25C gene expression of GK. One representative RT-PCR picture was shown. doi:10.1371/journal.pone.0101959.g005

EGFR modulate keratinocyte proliferation, migration and transformation that is important for wound healing and carcinogenesis. Previous reports have found an elevation of EGFR expression in OSCC and its association with the metastasis of OSCC [6,13]. AG1478, an EGFR inhibitor, may inhibit tumor formation and

progress in mouse OSCC models. ROS may activate EGFR signaling [37] and EGF can stimulate COX-2 expression via p38 and ERK, but independent of Src and NF-κB signaling in oral epithelial cells [38]. We further found that ANE activates EGFR (Tyr845) of GK to mediate COX-2 expression and PGE<sub>2</sub>



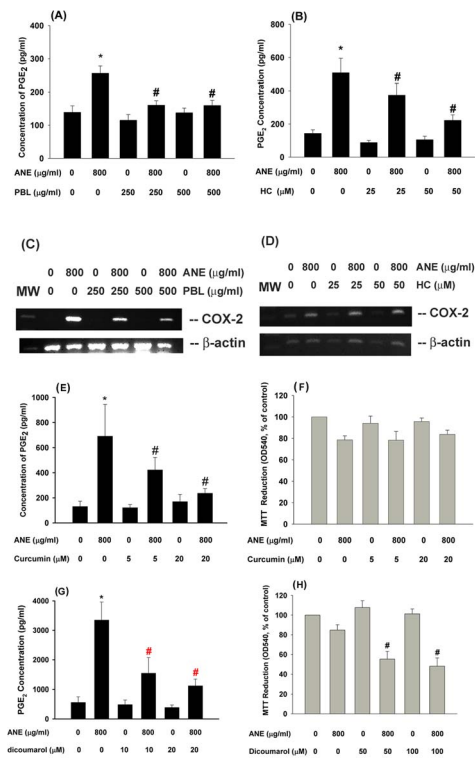

**Figure 6. Effect of PBL and HC on the ANE-induced PGE<sub>2</sub> production and Cox-2 expression of GK.** (A) Effect of PBL (250 and 500 μg/ml) on ANE-induced PGE<sub>2</sub> production in GK, (B) Effect of HC (25 and 50 μM) on ANE-induced PGE<sub>2</sub> production in GK, (C) Effect of PBL on ANE-induced Cox-2 expression in GK, (D) Effect of HC (25 and 50 μM) on ANE-induced Cox-2 expression in GK. One representative PCR picture was shown. The expression of β-actin was used as control. (E) Effect of curcumin on ANE-induced PGE<sub>2</sub> production in GK (n=7). (F) Effect of curcumin on ANE-induced cytotoxicity as analyzed by MTT assay. Results were expressed as % of control (as 100%), Mean ± SE (n=4). (G) Effect of dicoumarol (10 and 20 μM) on ANE-induced PGE<sub>2</sub> production in GK (n=6). (H) Effect of dicoumarol (50 and 100 μM) on ANE-induced cytotoxicity as analyzed by MTT assay (n=5). \*denotes statistically significant difference when compared with solvent control group, #denotes significant difference when compared with ANE (800 μg/ml)-treated group.

doi:10.1371/journal.pone.0101959.g006

production. However, ANE does not activate EGFR (Tyr1068 and Tyr1173) in OECM-1 oral cancer cells [33]. The differential response of GK and OECM-1 cells to ANE is possibly due to difference in cell regulation of primary keratinocytes and cancer cell lines. ANE activates both ERK and JNK phosphorylation, whereas EGF stimulates ERK and p38 phosphorylation in OECM-1 cells [33]. Our results highlight the potential use of EGFR antibodies or antagonists for prevention or treatment of OSCC.

Src and Ras may regulate cell adhesion, invasion, proliferation, survival, and angiogenesis, which are crucial for tumor development [8,35]. Various growth factors, receptor tyrosine kinase (e.g., EGFR) and Src may stimulate multiple signaling pathways such as Ras/MEK/ERK, GTPase activation proteins and focal adhesion kinases [8,35]. We intriguingly found that ANE activates Src and Ras to mediate ANE-induced COX-2 expression and PGE<sub>2</sub> production in primary GK. Sodium orthovanadate (a tyrosine phosphatase inhibitor) enhanced the ANE-induced PGE<sub>2</sub> production in GK (**data not shown**), further supporting the tyrosine kinase activation in mediating these events. Similarly, recent study

has found that BQ ingredients may stimulate Src activation in oral cancer epithelial cells to promote cell migration and tumor invasion [39]. An elevated expression of Ras and mutation of Ras in oral premalignant lesions and OSCC of BQ chewers has been reported [14,40]. This indicates that activation of Src and Ras is important in the BQ carcinogenesis.

Impairment of cell cycle control and aberrant epithelial differentiation are crucial for the initiation, promotion and progression of cancer. ANE may induce DNA breaks and stimulate differentiation of buccal epithelial cells as indicated by increased expression of involucrin [41]. However, ANE is recently shown to down-regulate involucrin expression in oral keratinocytes via PI3K/Akt but not MEK1/2 signaling [42]. The precise reasons are no clear. Keratin 5 and keratin 14 are two hallmarks expressed by mitotic active basal keratinocytes in the stratified squamous epithelium and have tissue protective function [43]. When the basal keratinocytes differentiate to suprabasal compartment, keratin 5 and keratin 14 expressions decreased [43]. The expression of keratins can be regulated at transcriptional level by AP-1, AP-2 or SP1. Thus expression keratin is important for the integrity and function of normal epithelium. In this study, we found that ANE inhibited the expression of keratin 5 and keratin 14, suggesting the induction of GK differentiation by ANE. The ANE-induced decline of keratin 14 expression is associated with CYP1A1 activation and Src signaling, but not directly via EGFR, Ras and COX activation. Src and PI3K signaling has been shown being activated in the early stage of epithelial differentiation [44]. Possibly the metabolism of ANE by CYP1A1 may stimulate multiple signaling pathways that show compensatory cross-talks. This may partly explain why an elevated expression of differentiation markers such as keratin 1 and involucrin was noted after exposure to tumor promoters and observed in most oral premalignant lesions, whereas a decreased expression is identified in severe dysplasia and poorly differentiated cancer [45].

We have found that ANE and arecoline may induce G2/M cell cycle arrest of oral epithelial cells via activation of Chk1/Chk2 signaling pathways to provide the time for DNA repair [17,25], because ANE and arecoline are known to exhibit genotoxicity [2]. This may explain why ANE inhibits cdc25C and cyclin B1 expression of GK in this study. The inhibition of cdc25C and cyclin B1 was reversed by α-naphthoflavone and manumycin C, but not EGFR, Src and aspirin, indicating the involvement of CYP1A1 and Ras activation in this event. ANE may induce cell cycle arrest and cellular senescence with upregulation of p38, p21, p16, NF-κB, IL-6 and COX-2 in oral keratinocytes [34]. Ras may regulate p53 and further affect cdc25 and cyclinB1 and promote cellular senescence [46], revealing the Ras activation in modulation of oral carcinogenesis.

Clinically one critical health issue is whether addition of betel leaf (*piper betle* leaf, PBL) into BQ may enhance or attenuate the carcinogenicity and toxicity of BQ. We interestingly found that PBL extract and HC prevented the ANE-induced PGE<sub>2</sub> production in GK. This reveals that suitable addition of PBL in BQ may provide some beneficial effects against ANE toxicity to tissue/organs. However, HC showed no marked effect on ANE-stimulated COX-2 expression, whilst PBL extract prevented the ANE-induced COX-2 expression. This suggests that effects by PBL are possibly related to inhibition of ANE-induced signaling transduction, gene expression at transcriptional/translational level and even enzyme activity. Accordingly HC can inhibit both COX-1 and COX-2 enzyme activities [16] and thereby COX-mediated products such as prostanoids and thromboxane in platelets.

In this study, GK was shown to express NQO-1 (**data not shown**). Dicoumarol, a NQO-1 inhibitor, can attenuate the

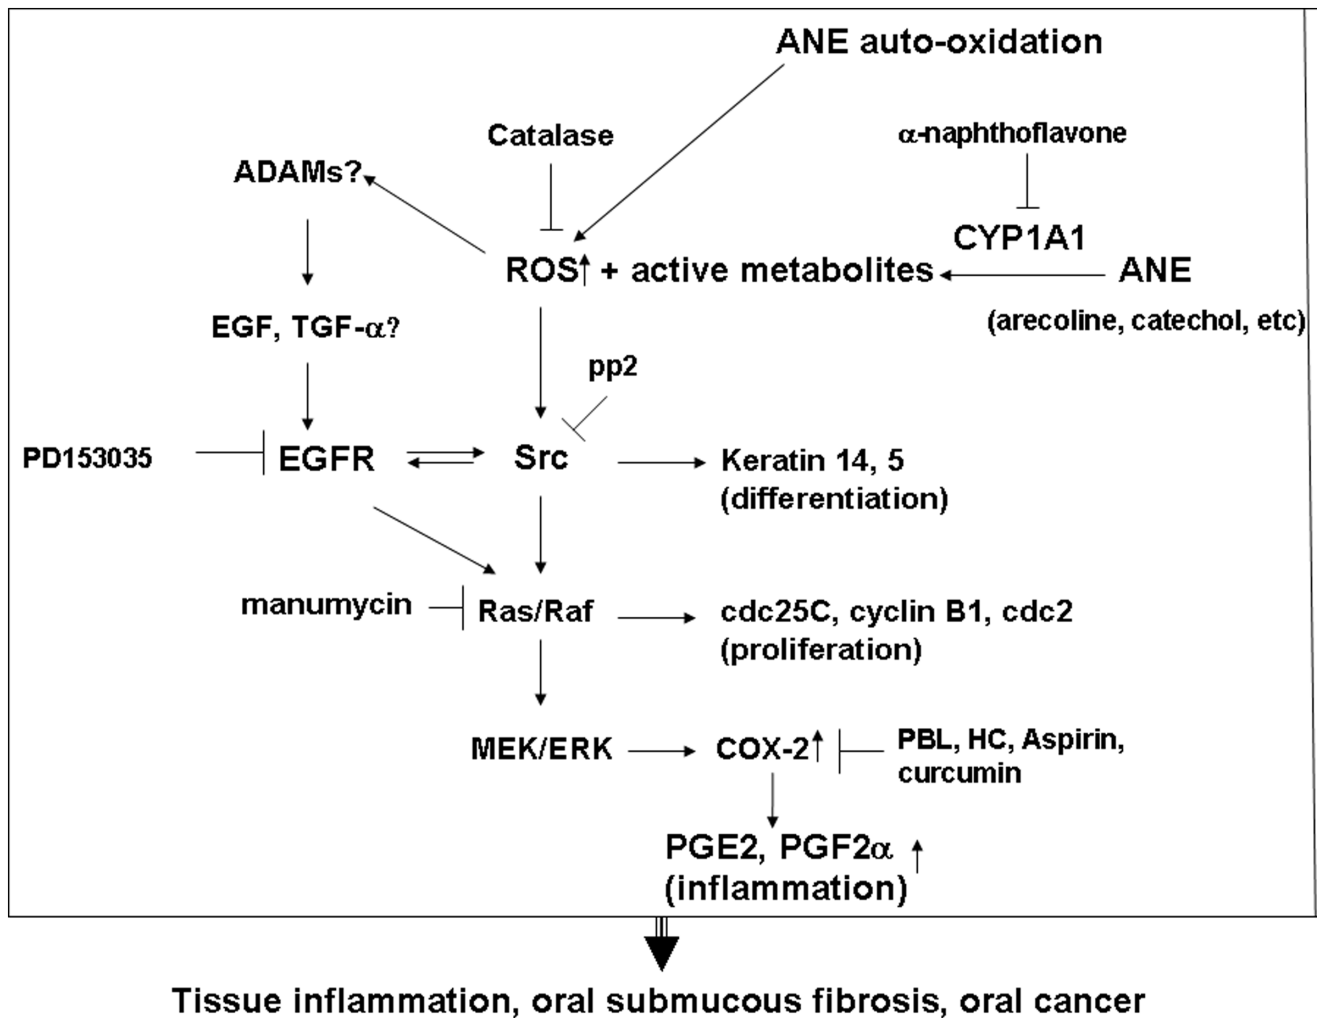

**Figure 7. The proposed mechanism of ANE-induced molecular changes (CYP1A1, ROS, Src, EGFR, Ras, COX, PGE<sub>2</sub>, keratins and cyclin B1 etc.) in oral mucosal cells.** Signal transduction pathways responsible for the AN-induced alterations in cell proliferation, differentiation and inflammation of GK were shown.  
doi:10.1371/journal.pone.0101959.g007

ANE-induced PGE<sub>2</sub> production at concentrations of 10–20 μM. This is possibly due to its inhibition of NF-κB. But dicoumarol further enhanced the ANE-induced cytotoxicity at higher concentrations (50–100 μM), possibly due to its inhibition of NF-κB and NQO-1. Similarly, dicoumarol may enhance the 9-chloro-β-lapachone-induced cytotoxicity in hepatocytes [47]. Dicoumarol also enhanced the gemcitabine-induced cytotoxicity to cholangiocarcinoma cells [48]. NQO-1 has been shown to exhibit dual roles in detoxification or activation of procarcinogens. NQO-1 mediate the 2 electron reduction of quinone to hydroquinone for further conjugation and secretion but not the generation of toxic semiquinone intermediates, thus reducing ROS production and electrophilic attack [48]. These results suggest that one electron reduction of quinone by NADPH-CYP450 reductase may generate more toxic semiquinone intermediates, whereas 2 electron reduction of ANE components by NQO-1 generate less cytotoxic intermediates. The other possibility is inhibition of NQO-1 promote the cytotoxicity of ANE components with quinone-like structure that is widely distributed in natural products and clinical drugs. Accordingly ANE has been shown to contain polyphenols and catechols with pro-oxidant property and quinone structure that can be metabolized by CYP and NQO-1 to affect

their cytotoxicity especially in the presence of transition metals [49]. AN polyphenols have been shown to inhibit COX-2 expression at low concentration, but stimulate COX-2 at higher concentrations [50]. Since catechol cannot stimulate PGE<sub>2</sub> production of GK in our study, this indicates that semiquinone intermediates generated during metabolism of AN polyphenols and catechol may contribute to ANE-induced cytotoxicity to GK.

In conclusion, auto-oxidation or metabolic activation of ANE components by CYP1A1 may generate ROS and reactive metabolites (Figure 7). ROS could activate multiple signaling pathways such as EGFR, Src and Ras to affect cdc25C, cyclin B1 and keratin 14 expression, to mediate MEK/ERK signaling, COX-2 expression and prostanooids production. PBL extract, HC and curcumin inhibited the ANE-induced PGE<sub>2</sub> production by differential mechanisms. The aberrant growth, differentiation and inflammation induced by BQ components may contribute to the pathogenesis of OSF and OSCC. Future targeting therapy for EGFR, Src, and Ras may be potentially used clinically for prevention and treatment of BQ-chewing-related diseases. Moreover, the addition of PBL (with HC) into BQ can potentially attenuate the oral mucosal inflammatory response. Dietary consumption or intake of curcumin is a useful strategy to prevent

the BQ-chewing-related mucosal inflammatory response and even carcinogenesis. Whether BQ components may activate upstream a disintegrin and metalloproteinases (ADAMs) and EGF/TGF production should be further addressed to clarify the pathogenesis of BQ carcinogenesis.

## Acknowledgments

The authors would like to thank Miss HF Jeng and Sylvia Li for their technical assistance.

## References

- Warnakulasuriya S, Trivedy C, Peters TJ (2002) Areca nut use: an independent risk factor for oral cancer. *Br Med J* 324: 799–800.
- Jeng JH, Chang MC, Hahn IJ (2001) Role of areca nut in betel quid-associated chemical carcinogenesis: current awareness and future perspectives. *Oral Oncol* 37: 477–492.
- Sharan RN, Choudhury Y (2010) Chapter 15 “Betel nut and susceptibility to cancer” in Roy D & Dorak MT (eds) “Environmental Factors, Genes and Development of Human Cancers”, page 401–428, Springer Science.
- Parke DV (1994) The cytochrome P450 and mechanisms of chemical carcinogenesis. *Environ Health Perspect* 102: 852–853.
- Vendramini-Costa DB, Carvalho JE (2012) Molecular link mechanisms between inflammation and cancer. *Curr Pharm Des* 18: 3831–3856.
- Chiang WF, Liu SY, Yen CY, Lin CN, Chen YC, et al. (2008) Association of epidermal growth factor receptor (EGFR) gene copy number amplification with neck lymph node metastasis in areca-associated oral carcinomas. *Oral Oncol* 44: 270–276.
- Leonard SS, Harris GK, Shi XL (2004) Redox-active metal ions, reactive oxygen species, and apoptosis. *Free Radic Biol Med* 37: 1921–1942.
- Murugan AK, Munirajan AK, Tsuchida N (2012) Ras oncogenes in oral cancer: the past 20 years. *Oral Oncol* 48: 383–392.
- Nair UJ, Friesen M, Richard I, MacLennan R, Thomas S, et al. (1990) Effect of lime composition on the formation of reactive oxygen species from areca nut extract in vitro. *Carcinogenesis* 11: 2145–2148.
- Pandey M, Prakash O, Santhi WS, Soumithran CS, Pillai RM (2008) Overexpression of COX-2 gene in oral cancer is independent of stage of disease and degree of differentiation. *Int J Oral Maxillofac Surg* 37: 379–383.
- Marks F, Furstemberger G (2000) Cancer chemoprevention through interruption of multistage carcinogenesis. The lessons learnt by comparing mouse skin carcinogenesis and human large bowel cancer. *Eur J Cancer* 36: 314–329.
- Chang MC, Wu HL, Lee JJ, Lee PH, Chang HH, et al. (2004) The induction of prostaglandin E2 production, interleukin6 production, cell cycle arrest and cytotoxicity in primary oral keratinocytes and KB cancer cells by areca nut ingredients is differentially regulated by MEK/ERK activation. *J Biol Chem* 279: 50676–50683.
- Huang SF, Chung WY, Chen IH, Liao CT, Wang HM, et al. (2009) EGFR protein overexpression and mutation in areca quid-associated oral cavity squamous cell carcinoma in Taiwan. *Head Neck* 31: 1068–1077.
- Kuo MY, Jeng JH, Chiang CP, Hahn IJ (1994) Mutations of Ki-ras oncogene codon 12 in betel quid chewing-related human oral squamous cell carcinoma in Taiwan. *J Oral Pathol Med* 23: 70–74.
- Jeng JH, Chen SY, Liao CH, Tung YY, Lin BR, et al. (2002) Modulation of platelet aggregation by areca nut and betel leaf ingredients: roles of reactive oxygen species and cyclooxygenase. *Free Radic Biol Med* 32: 860–871.
- Chang MC, Uang BJ, Tsai CY, Wu HL, Lin BR, et al. (2007) Hydroxychavicol, a novel betel leaf component, inhibits platelet aggregation by suppression of cyclooxygenase, thromboxane production and calcium mobilization. *Br. J. Pharmacol.* 152, 73–82.
- Chang MC, Chan CP, Wang WT, Chang BE, Lee JJ, et al. (2013). Toxicity of areca nut ingredients: activation of Chk1/Chk2, inducing cell cycle arrest, and regulation of MMP-9 and TIMPs production in SAS epithelial cells. *Head & Neck* (In press).
- Chan CP, Chang MC, Wang YJ, Chen LI, Tsai YL, et al. (2008) Thrombin activates Ras-CREB/ATF-1 signaling and stimulates c-fos, c-jun and c-myc expression in human gingival fibroblasts. *J Periodontol* 79: 1248–1254.
- Hakkola J, Pasanen M, Hukkanen J, Pelkonen O, Maenpaa J, et al. (1996) Expression of xenobiotic-metabolizing cytochrome P450 forms in human full-term placenta. *Biochem Pharmacol* 51: 403–411.
- Chang MC, Chen LI, Chan CP, Lee JJ, Wang TM, et al. (2010) The role of reactive oxygen species and hemoxygenase-1 expression in the cytotoxicity, cell cycle alteration and apoptosis of dental pulp cells induced by BisGMA. *Biomaterials* 31: 8164–8171.
- Endres M, Leinase I, Kaps C, Wentges M, Unger M, et al. (2005) Changes in the gene expression pattern of cytokeratins in human respiratory epithelial cells during culture. *Eur Arch Otorhinolaryngol* 262: 390–396.
- Brown IJ, Geesin JC, Rothnagel JA, Roop DR, Gordon JS (1994) Retinoic acid suppression of loricrin expression in reconstituted human skin cultured at the liquid-air interface. *J Invest Dermatol* 102: 886–890.
- Pae HO, Chung HT (2009) Hemoxygenase-1: its therapeutic roles in inflammatory diseases. *Immune Netw* 9: 12–9.
- Meng B, Li J, Cao H (2013) Antioxidant and anti-inflammatory activities of curcumin on diabetes mellitus and its complications. *Curr Pharm Des* 19: 2101–2113.
- Chang MC, Ho YS, Lee PH, Chan CP, Lee JJ, et al. (2001) Areca nut extract and arecoline induced the cell cycle arrest but not apoptosis of cultured oral KB epithelial cells: association of glutathione, reactive oxygen species and mitochondrial membrane potential. *Carcinogenesis* 22: 1527–1535.
- Hernando-Rodriguez M, Rey-Baria N, Marichalar-Mendia X, Rodriguez-Tojo MJ, Acha-Sagredo A, et al. (2012) Role of cytochrome P-450 genetic polymorphism in oral carcinogenesis. *J Oral Pathol Med* 41: 1–8.
- Li N, Hu Q, Jiang C, Hu Y, Yuan Y, et al. (2011) Novel genetic biomarkers for susceptibility to oral submucous fibrosis: cytochrome P450 3A. *Med Hypothesis* 77: 834–836.
- Topcu Z, Chiba I, Fujieda M, Shibata T, Ariyoshi N, et al. (2002) CYP2A6 gene deletion reduces oral cancer risk in betel quid chewers in Sri Lanka. *Carcinogenesis* 23: 595–598.
- Sparfel L, Loewert M, Huc L, Payen L, Guillouzo A, et al. (2002) Acute cytotoxicity of the chemical carcinogen 2-acetylaminofluorene in cultured rat liver epithelial cells. *Toxicol Lett* 129: 245–254.
- Singh A, Rao AR (1995) Effect of areca nut, a masticatory, on hepatic drug metabolizing enzymes –SH content and lipid peroxidation in lactating mothers and their suckling neonates. *Cancer Lett* 92: 175–180.
- Sparfel L, Loewert M, Huc L, Payen L, Guillouzo A, et al. (2007) Arecoline inhibits the 2,3,7,8-tetrachlorodibenzo-p-dioxin- induced cytochrome P450 1A1 activation in human hepatoma cells. *J Hazard Mater* 146: 356–361.
- Miyazaki M, Sugawara E, Yoshimura T, Yamazaki H, Kamataki T (2005) Mutagenic activation of betel quid-specific N-nitrosamines catalyzed by human cytochrome P450 coexpressed with NADPH-cytochrome P450 reductase in *Salmonella typhimurium* YG7108. *Mutat Res* 581: 165–171.
- Lin SC, Lu SY, Lee SY, Lin CY, Chen CH, et al. (2005) Areca (betel) nut extract activates mitogen-activated protein kinases and NFkappaB in oral keratinocytes. *Int J Cancer* 116: 526–535.
- Lu SY, Chang KW, Liu CJ, Tseng YH, Lu HH, et al. (2006) Ripe areca nut extract induces G1 phase arrests and senescence-associated phenotypes in normal human oral keratinocyte. *Carcinogenesis* 27: 1273–1284.
- Kim LC, Song L, Haura EB (2009) Src kinases as therapeutic targets for cancer. *Nat Rev Clin Oncol* 6: 587–595.
- Ardito CM, Gruner BM, Takeuchi KK, et al. (2012) EGF receptor is required for KRAS-induced pancreatic tumorigenesis. *Cancer Cell* 22: 304–317.
- El-Abasri TB, Putta S, Hansen LA (2006) Ultraviolet irradiation induces keratinocyte proliferation and epidermal hyperplasia through the activation of the epidermal growth factor receptor. *Carcinogenesis* 27: 225–231.
- Husvik C, Bryne M, Halsteasen TS (2009) Epidermal growth factor-induced cyclooxygenase-2 expression in oral squamous cell carcinoma cell lines is mediated through extracellular signal-regulated kinase 1/2 and p38 but is Src and nuclear factor-kappa B independent. *Eur J Oral Sci* 117: 528–535.
- Chen JY, Huang CC, Huang KL, Chen YT, Liu SY, et al. (2008) Src family kinases mediate betel quid-induced oral cancer cell motility and could be a biomarker for early invasion in oral squamous cell carcinoma. *Neoplasia* 10: 1393–1401.
- Kuo MY, Chang HH, Hahn IJ, Wang JT, Chiang CP (1995) Elevated ras p21 expression in oral premalignant lesions and squamous cell carcinoma in Taiwan. *J Oral Pathol Med* 24: 255–260.
- Sundqvist K, Graftstrom RC (1992) Effects of areca nut on growth, differentiation and formation of DNA damage in cultured buccal epithelial cells. *Int J Cancer* 52: 305–310.
- Tseng YH, Chang CS, Liu TY, Kao SY, Chang KW, et al. (2007) Areca nut extract treatment down-regulates involucrin in normal human oral keratinocyte through PI3K/AKT activation. *Oral Oncol* 43: 670–679.
- Alam H, Sehgal L, Kundu ST, Dalal SN, Vaidya MM (2011) Novel function of keratins 5 and 14 in proliferation and differentiation of stratified epithelial cells. *Mol Biol Cell* 22: 4068–4078.
- Tu CL, Chang W, Xie Z, Bikle DD (2008) Inactivation of the calcium sensing receptor inhibits E-cadherin-mediated cell-cell adhesion and calcium-induced differentiation in human epidermal keratinocytes. *J Biol Chem* 283: 3519–3528.

## Author Contributions

Conceived and designed the experiments: MCC JHJ YJC. Performed the experiments: MCC YJC HHC CYY YLW RHC. Analyzed the data: CYY HHC. Contributed reagents/materials/analysis tools: RHC CPC MCC JHJ. Contributed to the writing of the manuscript: MCC YJC JHJ LJH.

45. Gimenez-Conti IB, Shin DM, Bianchi AB, Roop DR, Hong WK, et al. (1990) Changes in keratin expression during 7,12-dimethylbenz[a]anthracene -induced hamster cheek pouch carcinogenesis. *Cancer Res* 50: 4441–4445.
46. Lowe SW (1999) Activation of p53 by oncogenes. *Endocr Relat Cancer* 6: 45–48.
47. Fernandez Villamil SH, Carrizo PH, Di Rosso ME, Molina Portela MP, Dubin M (2012) The metabolism of 9-chloro- $\beta$ -lapachone and its effects in isolated hepatocytes. The involvement of NAD(P)H:quinine oxidoreductase-1 (NQO-1). *Chem-Biol Interact* 200: 84–91.
48. Buranrat B, Prawan A, Kukongviriyapan U, Kongpetch S, Kukongviriyapan V (2010) Dicoumarol enhances gemcitabine- induced cytotoxicity in high NQO1-expressing cholangiocarcinoma cells. *World J Gastroenterol* 16: 2362–2370.
49. Nemeikaite-Ceniene A, Imbrasaitė A, Sergedienė E, Cenas N (2005) Quantitative structure-activity relationships in prooxidant cytotoxicity of polyphenols: role of potential of phenoxyl radical/phenol redox couple. *Arch Biochem Biophys* 441: 182–190.
50. Huang PL, Chi CW, Liu TY (2010) Effects of Areca catechu L. containing procyanidins on cyclooxygenase-2 expression in vitro and in vivo. *Food Chem Toxicol* 48: 306–313.
